# MIND TO MIND

*Creative writing that explores the abstract side  
of our profession and our lives*

*Carol Wiley Cassella, M.D., Editor*

## Special Delivery

Donald Caton, M.D.\*

THREE a.m., heels riding-stirrups hard,  
Girlhood dreams upended  
Squealing love's fruit into Klieg  
Bright lights. Man - what a trip  
You've had. Gently

Pulled by Love, perhaps, but never  
Feather dumb struck Leda like,  
Nor wooed by sexy couplets  
Whispered by some bronze  
Clad dude. No

My dear, passion brought you down  
To earth. Pheromones twitched  
Your adolescent nerves (and his)  
And sent you shuffling to his side,  
Future bound by carbon chains.

What cosmic whim transmits this legacy of Adam  
In wisps of aromatic carbon atoms?

\* University of Florida, Gainesville, Florida. dccaton@bellsouth.net

Accepted for publication May 8, 2012.

Copyright © 2013, the American Society of Anesthesiologists, Inc. Lippincott Williams & Wilkins. Anesthesiology 2013; 118:457
